# Supplementary material for: Invisible burden of COVID-19: enzyme replacement therapy disruptions
Source: publisher site journal article supplement (doi:10.1515/jpem-2021-0067), 2021-04-05
Supplement: Supplementary file 1 [file j_jpem-2021-0067_suppl.docx]

**APPENDİX-A.** Structured Questionnaire forms

If you are an adult with LSD, please answer as you see fit. If you are the parent or guardian of a child with LSD, please answer on behalf of your child.

1- Date of Birth

2- Sex

3- The type of your illness, the medicine used

4- Enzyme replacement therapy start date

5- Frequency of taking enzyme

6- Region of residence

7- Civil administrations

- Province
- Town
- Village

8- Number of people living in the home

9- Working status of patients

10- Working status of the mother

11- Working status of the father

12- Working status of patient’s siblings

13- Living with an individual over the age of 65

Yes No

14- Living with another patient with lysosomal storage disorders at home

Yes No

15- If your answer to the previous question is yes, who?

16- Does the patient attend school? (For our school age and university patients)

Yes No

17- Is there a change of duty or priority at work because of your child's illness or if you are sick?

Yes No

18- Where is your ERT administered now, during COVID-19?

Change of hospital

Shift to home therapy

No Change

19- Have you made any changes to the hospital where you receive the infusions?

Yes No

20- How many kilometers do you travel from home to get to your infusion center?

21- Have you ever missed an ERT dose because of COVID-19?

Yes No

22- Have you had difficulty in obtaining your medication due to COVID-19?

Yes No

23- If you had problems obtaining or taking your medication, how many doses did you have problems taking?

24- What was your reason for not receiving ERT?

- I couldn't go to the hospital because I was afraid/worried
- I could not obtain the medicine
- I had a transportation problem going to the hospital.
- There was no room in my hospital because of COVID-19 patients
- Other

25- If you could not take medication, was your child / sick person affected by this situation?

Yes No

26- Explain if affected.

27- Did COVID-19 pandemic affect your social life?

Yes No

28- How COVID-19 affected your life

- Very negatively affected
- Slightly negatively affected
- Not affected

29- How COVID-19 affected the lives of other family members

- Very negatively affected
- Slightly negatively affected
- Not affected

30- Where did you get the information about COVID-19?

- Television Broadcasts
- Physician's opinion
- Internet broadcasts
- Family Members
- Friends

31- Was anyone living at home diagnosed with COVID-19?

Yes No

32- Do you follow the rule of staying at home?

I comply fully

I rarely go out (eg only for the market)

I don't follow the rule of staying at home

33- Do you think that your risk of severe COVID-19 is increased?

Yes

No

Not knowing

34- What are your thoughts about the pandemic?

**APPENDİX-B.** Socio-demographic table

| Civil administrations  Province  Town  Village | 44  27  4 | 58.7  36.0  5.3 |
| --- | --- | --- |
| Working status of patients  Working constantly  Not working | 11  62 | 15.1  84.9 |
| Working status of the mother  Working constantly  Not working | 6  69 | 8  92 |
| Working status of the father  Working constantly  Not working | 49  26 | 65.3  34.7 |
| Working status of siblings  Working constantly  Not working | 2  67 | 3.1  96.9 |
| Living with an individual over the age of 65  Yes  No | 18  35 | 34  66 |
| Living with another patient with lysosomal storage disorders at home  Yes  No | 19  54 | 26  74 |
| Who is the other patient with LSD?  Sibling  Aunt | 18  1 | 94.7  5.3 |
| Does the patient attend school? (For our school age and university patients)  Yes  No | 36  36 | 50  50 |
| Is there a change of duty or priority at work because of LSD in the family?  Yes  No | 6  26 | 18.8  81.3 |
